# Supplementary material for: Intermediate snapshots of a 116-nuclear metallosupramolecular cage-of-cage in a homogeneous single-crystal-to-single-crystal transformation
Source: Royal Society of Chemistry journal article supplement (doi:10.1039/d1cc02219a), 2021-01-01
Supplement: d1cc02219a1.pdf [file d1cc02219a1.pdf]

## Electronic Supplementary Information (ESI)

# **Intermediate snapshots of a 116-nuclear metallo-supramolecular cage-of-cage in a homogeneous single-crystal-to-single-crystal transformation**

Benny Wahyudianto, Kento Imanishi, Tatsuhiro Kojima, Nobuto Yoshinari & Takumi Konno\*

Department of Chemistry, Graduate School of Science, Osaka University, Toyonaka, Osaka 560-  
0043, Japan

E-mail: [konno@chem.sci.osaka-u.ac.jp](mailto:konno@chem.sci.osaka-u.ac.jp)

## Materials

### Preparation of $[\text{Cd}_4\text{Na}_4\{\text{Au}_6\text{Cd}_3(\text{tdme})_2(\text{D-pen})_6\}_{12}(\text{NO}_3)_{12}] (\mathbf{1}_{\text{CdNa}})$ .

To a white suspension containing  $[\text{Au}_3(\text{tdme})(\text{D-Hpen})_3] \cdot 5\text{H}_2\text{O}$  (250 mg, 0.145 mmol) in 25 mL of ethanol was added 0.1 M aqueous NaOH (4.3 mL, 0.43 mmol) and 0.1 M aqueous  $\text{Cd}(\text{NO}_3)_2$  (4.3 mL, 0.43 mmol). The mixture was stirred at room temperature for 6 h to afford a smoky solution. After 4 days, colourless cubic crystals ( $\mathbf{1}_{\text{CdNa}}$ ) were collected by filtration. Yield: 142.1 mg (56.8%). Found: C, 32.17; H, 4.10; N, 2.43%. Anal. Calcd for  $[\text{Cd}_4\text{Na}_4\{\text{Au}_6\text{Cd}_3(\text{tdme})_2(\text{D-pen})_6\}_{12}(\text{H}_2\text{O})_{16}](\text{NO}_3)_{12} \cdot 262\text{H}_2\text{O} = \text{C}_{1344}\text{H}_{2140}\text{Au}_{72}\text{Cd}_{40}\text{N}_{84}\text{Na}_4\text{O}_{458}\text{P}_{72}\text{S}_{72}$ : C, 32.21; H, 4.30; N, 2.35%. IR spectrum ( $\text{cm}^{-1}$ , KBr disk): 1436 ( $\nu_{\text{Ph}}$ ), 745 ( $\nu_{\text{Ph}}$ ), 1100 ( $\nu_{\text{P-Ph}}$ ), 1585 ( $\nu_{\text{COO}}$ ), 1386 ( $\nu_{\text{NO}_3}$ ).

### Preparation of $[\text{Co}_8\{\text{Au}_6\text{Co}_3(\text{tdme})_2(\text{D-pen})_6\}_{12}(\text{NO}_3)_{16}] (\mathbf{1}_{\text{Co}})$ .

Single crystals of  $\mathbf{1}_{\text{CdNa}}$  (425 mg, 8.5  $\mu\text{mol}$ ) were soaked in 1 M aqueous  $\text{Co}^{\text{II}}(\text{NO}_3)_2$  (3 mL, 3 mmol). After the mixture was allowed to stand at room temperature for 6 days, the colour of the crystals changed from colourless to blue ( $\mathbf{1}_{\text{Co}}$ ), and the crystal shape was retained. Yield: 83.8 mg (19.7%). Found: C, 31.42; H, 3.90; N, 3.14%. Anal. Calcd for  $[\text{Co}_8\{\text{Au}_6\text{Co}_3(\text{tdme})_2(\text{D-pen})_6\}_{12}(\text{H}_2\text{O})_{16}](\text{NO}_3)_{16} \cdot 18\text{Co}(\text{NO}_3)_2 \cdot 244\text{H}_2\text{O} = \text{C}_{1344}\text{H}_{2104}\text{Au}_{72}\text{Co}_{62}\text{N}_{124}\text{O}_{560}\text{P}_{72}\text{S}_{72}$ : C, 31.45; H, 4.13; N, 3.38%. IR spectrum ( $\text{cm}^{-1}$ , KBr disk): 1433 ( $\nu_{\text{Ph}}$ ), 743 ( $\nu_{\text{Ph}}$ ), 1100 ( $\nu_{\text{P-Ph}}$ ), 1577 ( $\nu_{\text{COO}}$ ), 1382 ( $\nu_{\text{NO}_3}$ ).

### Elemental analysis for $\mathbf{1}^{\text{h}}$ , $\mathbf{1}^{\text{h}}$ , $\mathbf{1}^{\text{d}}$ , $\mathbf{1}^{\text{d}}$ , and $\mathbf{1}^{\text{d}}$

$\mathbf{1}^{\text{h}}$ : Found: C, 30.99; H, 3.99; N, 2.97%. Anal. Calcd for  $[\text{Cd}_4\text{Co}_4\{\text{Au}_6\text{Cd}_{2.97}\text{Co}_{0.03}(\text{tdme})_2(\text{D-pen})_6\}_{12}(\text{H}_2\text{O})_{16}](\text{NO}_3)_{16} \cdot 18\text{Co}(\text{NO}_3)_2 \cdot 193\text{H}_2\text{O} = \text{C}_{1344}\text{H}_{2002}\text{Au}_{72}\text{Cd}_{39.64}\text{Co}_{22.36}\text{N}_{124}\text{O}_{509}\text{P}_{72}\text{S}_{72}$ : C, 30.73; H, 3.84; N, 3.31%.

$\mathbf{1}^{\text{h}}$ : Found: C, 31.02; H, 3.80; N, 3.36%. Anal. Calcd for  $[\text{Cd}_{2.92}\text{Co}_{5.08}\{\text{Au}_6\text{Cd}_{2.19}\text{Co}_{0.81}(\text{tdme})_2(\text{D-pen})_6\}_{12}(\text{H}_2\text{O})_{16}](\text{NO}_3)_{16} \cdot 18\text{Co}(\text{NO}_3)_2 \cdot 196\text{H}_2\text{O} = \text{C}_{1344}\text{H}_{2008}\text{Au}_{72}\text{Cd}_{29.2}\text{Co}_{32.8}\text{N}_{124}\text{O}_{512}\text{P}_{72}\text{S}_{72}$ : C, 31.03; H, 3.89; N, 3.34%.

$\mathbf{1}^{\text{d}}$ : Found: C, 31.12; H, 3.95; N, 3.41%. Anal. Calcd for  $[\text{Cd}_{2.66}\text{Co}_{5.34}\{\text{Au}_6\text{Cd}_{1.46}\text{Co}_{1.54}(\text{tdme})_2(\text{D-pen})_6\}_{12}(\text{H}_2\text{O})_{16}](\text{NO}_3)_{16} \cdot 18\text{Co}(\text{NO}_3)_2 \cdot 204\text{H}_2\text{O} = \text{C}_{1344}\text{H}_{2024}\text{Au}_{72}\text{Cd}_{20.18}\text{Co}_{41.82}\text{N}_{124}\text{O}_{520}\text{P}_{72}\text{S}_{72}$ : C, 31.23; H, 3.95; N, 3.36%.

$\mathbf{1}^{\text{d}}$ : Found: C, 31.72; H, 4.00; N, 3.26%. Anal. Calcd for  $[\text{Cd}_{1.53}\text{Co}_{6.47}\{\text{Au}_6\text{Cd}_{0.59}\text{Co}_{2.41}(\text{tdme})_2(\text{D-pen})_6\}_{12}(\text{H}_2\text{O})_{16}](\text{NO}_3)_{16} \cdot 18\text{Co}(\text{NO}_3)_2 \cdot 181\text{H}_2\text{O} = \text{C}_{1344}\text{H}_{1978}\text{Au}_{72}\text{Cd}_{8.61}\text{Co}_{53.36}\text{N}_{124}\text{O}_{497}\text{P}_{72}\text{S}_{72}$ : C, 31.87; H, 3.94; N, 3.43%.

**1<sup>4d</sup>**: Found: C, 30.97; H, 3.84; N, 3.37%. Anal. Calcd for  $[\text{Co}_8\{\text{Au}_6\text{Cd}_{0.05}\text{Co}_{2.95}(\text{tdme})_2(\text{D-pen})_6\}_{12}(\text{H}_2\text{O})_{16}](\text{NO}_3)_{16}\cdot 18\text{Co}(\text{NO}_3)_2\cdot 264\text{H}_2\text{O} = \text{C}_{1344}\text{H}_{2144}\text{Au}_{72}\text{Cd}_{0.6}\text{Co}_{61.4}\text{N}_{124}\text{O}_{580}\text{P}_{72}\text{S}_{72}$ : C, 31.21; H, 4.18; N, 3.36%.

### Physical measurements

The IR spectra in the range of 4000–400  $\text{cm}^{-1}$  were measured on a JASCO FT/IR-4100 spectrometer by using KBr pellets. Elemental analyses (C, H, N) were performed at Osaka University using YANACO MT-5 or MT-6. X-ray fluorescence spectrometry was performed on a SHIMADZU EXD-7000 spectrometer. Diffuse reflectance spectra in the range of 900–300 nm were measured on a JASCO V-670 spectrophotometer. CD spectra in the range of 900–300 nm were measured on a JASCO J-820 spectropolarimeter. Powder X-ray diffraction patterns were recorded under a controlled temperature in transmission mode [synchrotron radiation  $\lambda=1.0$  Å;  $2\theta$  range=2–78°; step width=0.018; data collection time=1 min] on a diffractometer equipped with a MYTHEN microstrip X-ray detector (Dectris Ltd.) at the SPring-8 BL02B2 beamline. To prevent the loss of crystallinity, microcrystals of each compound were loaded into a glass capillary tube (diameter=0.3 mm), together with the mother liquor.

### Single-crystal X-ray analysis

The diffraction data for **1<sub>CdNa</sub>**, **1<sub>Co</sub>**, **1<sup>1h</sup>**, **1<sup>6h</sup>**, **1<sup>1d</sup>**, **1<sup>2d</sup>** and **1<sup>4d</sup>** were recorded at 100 K with a Rayonix MX225HS CCD area detector with synchrotron radiation ( $\lambda = 0.6500$  Å) at the 2D beamline at the Pohang Accelerator Laboratory. The intensity data were processed using the HKL3000 program and collected by using the  $\omega$ -scan technique. The empirical absorption correction was performed using HKL3000. The diffraction data for **1<sub>CdZn</sub>** and **1<sub>CdMn</sub>** were recorded at 100 K with Hybrid Pixel Array Detector. The intensity data were processed using the CrysAlisPro (1.171.40.75a) program and collected by using the  $\omega$ -scan technique. The Numerical absorption correction was performed using CrysAlisPro (1.171.40.75a). The structures were solved by direct methods using SHELXS-2014. Structure refinements were carried out using full-matrix least-squares (SHELXL-2018/3). ISOR, DELU and SIMU restraints were applied for coordinated water molecules. Global SIMU were applied. All nonhydrogen atoms were refined anisotropically. Considering the elemental and X-ray fluorescence analytical results, the porous spaces in **1<sub>CdNa</sub>** are considered to contain a large number of water molecules of crystallization, while those in **1<sup>1h</sup>**, **1<sup>6h</sup>**, **1<sup>1d</sup>**, **1<sup>2d</sup>** and **1<sup>4d</sup>** contain not only water molecules but also aqua  $\text{Co}^{\text{II}}$  species and nitrate anions, although they were not found in the X-ray structures. The contributions of aqueous  $\text{Co}^{\text{II}}$  species,  $\text{NO}_3^-$  ions, and solvated water molecules were excluded using the SQUEEZE program in the PLATON package (ver. 20221). Some diffractions were

omitted to improve the data quality. For **1<sup>1h</sup>**, **1<sup>6h</sup>**, **1<sup>1d</sup>**, **1<sup>2d</sup>**, and **1<sup>4d</sup>**, each metal centre at M<sub>1</sub>, M<sub>2</sub>, M<sub>3</sub>, M<sub>4</sub>, and M<sub>5</sub> was refined as two positionally disordered metal ions (Na<sup>I</sup>/Co<sup>II</sup> or Cd<sup>II</sup>/Co<sup>II</sup>) with variable site occupancies. EADP and EXYZ constraints were applied for these positionally disordered two metal centres.

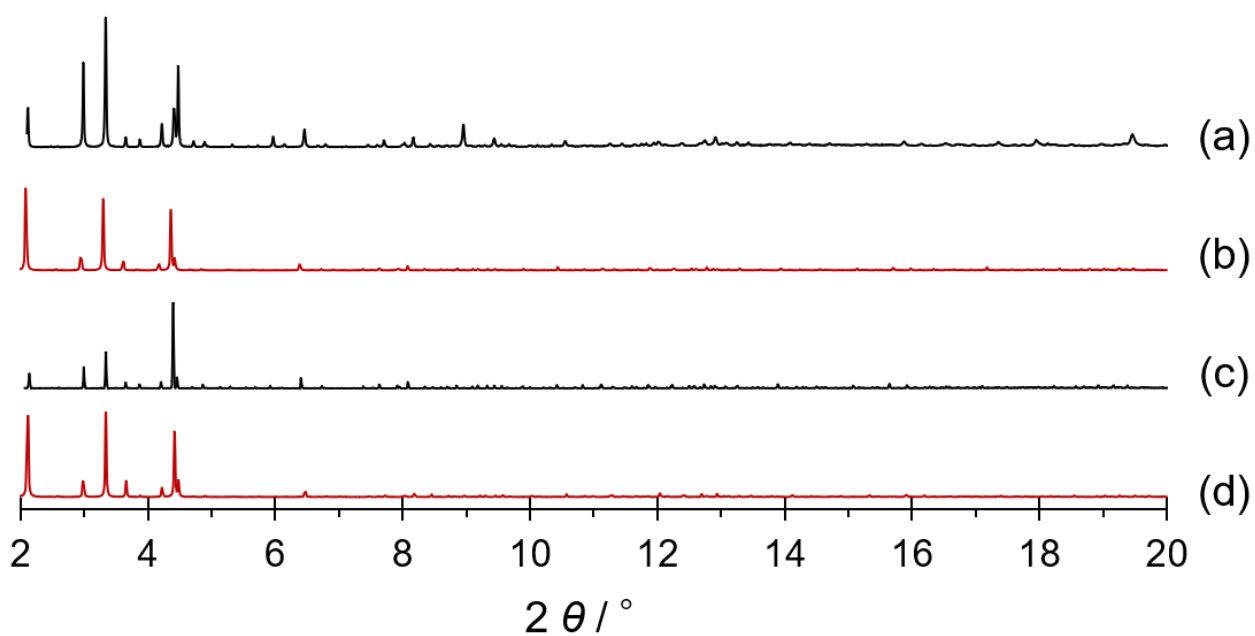

**Fig. S1.** The PXRDs that were measured in capillaries containing the mother liquor ( $\lambda = 1.000 \text{ \AA}$ ) (a)  $\mathbf{1}_{\text{CdNa}}$  and (c)  $\mathbf{1}_{\text{Co}}$ . The PXRDs that were simulated from single-crystal X-ray data collected at 100 K ( $\lambda = 1.000 \text{ \AA}$ ) (b)  $\mathbf{1}_{\text{CdNa}}$  and (d)  $\mathbf{1}_{\text{Co}}$ .

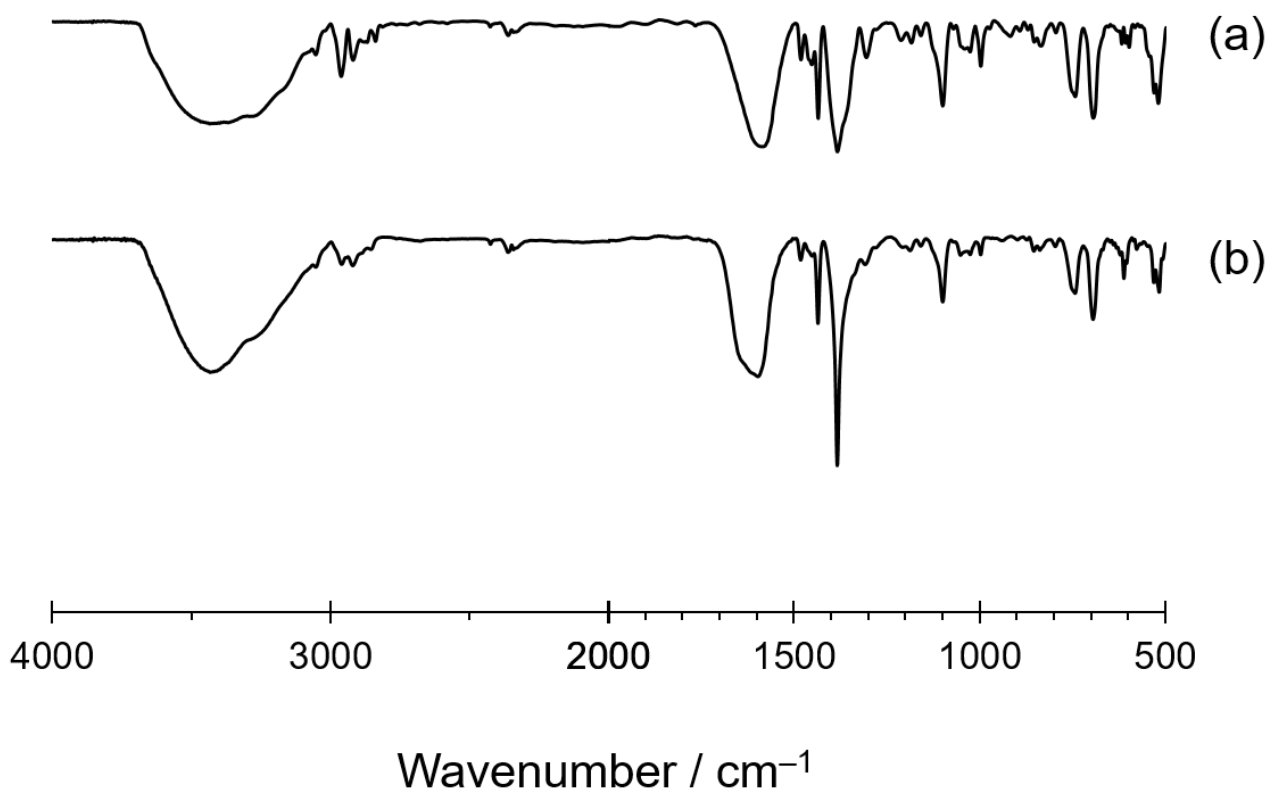

**Fig. S2.** IR spectra (KBr disk) of (a) **1<sub>CdNa</sub>** and (b) **1<sub>Co</sub>**.

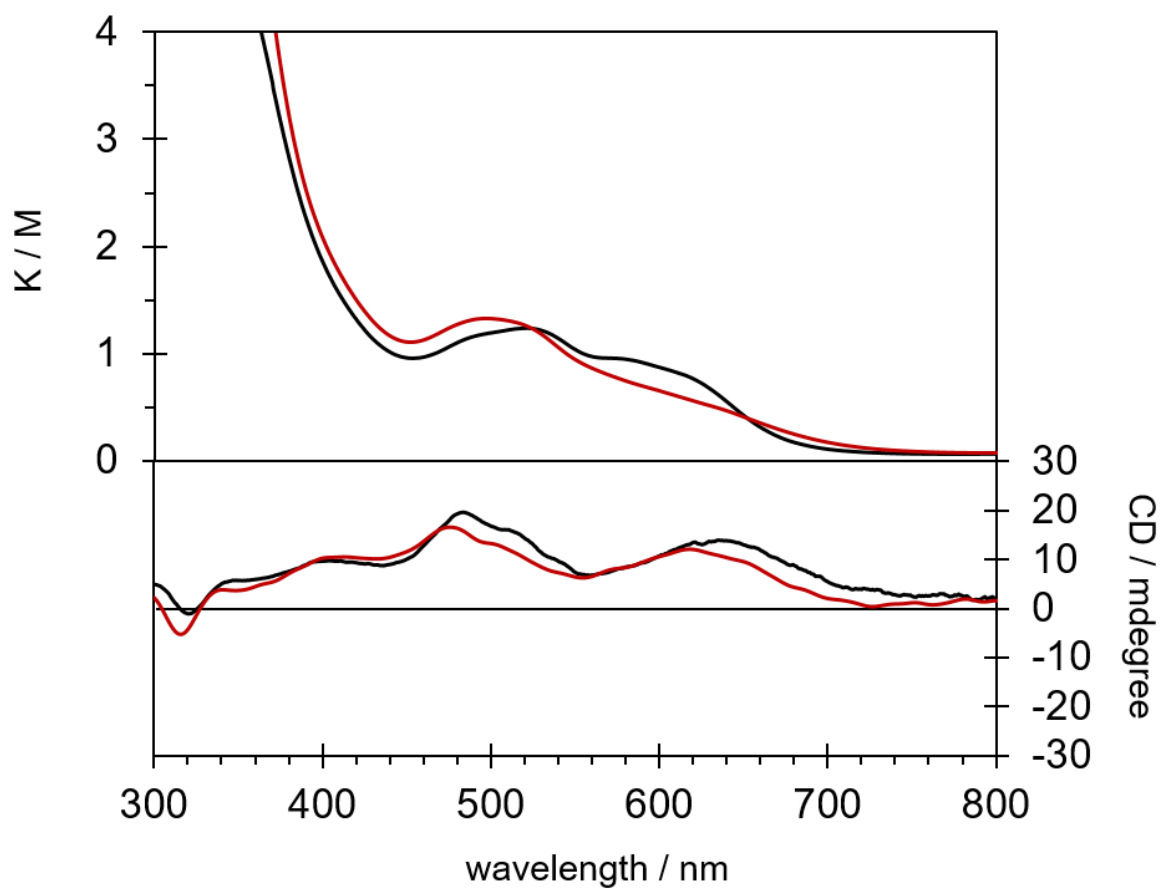

**Fig. S3.** Diffuse reflectance (top) and CD (bottom) spectra of **1Co** (black) and  $[\text{Co}^{\text{II}}_3(\text{L}^{\text{Au}^3})_2]$  (red) in the solid state.

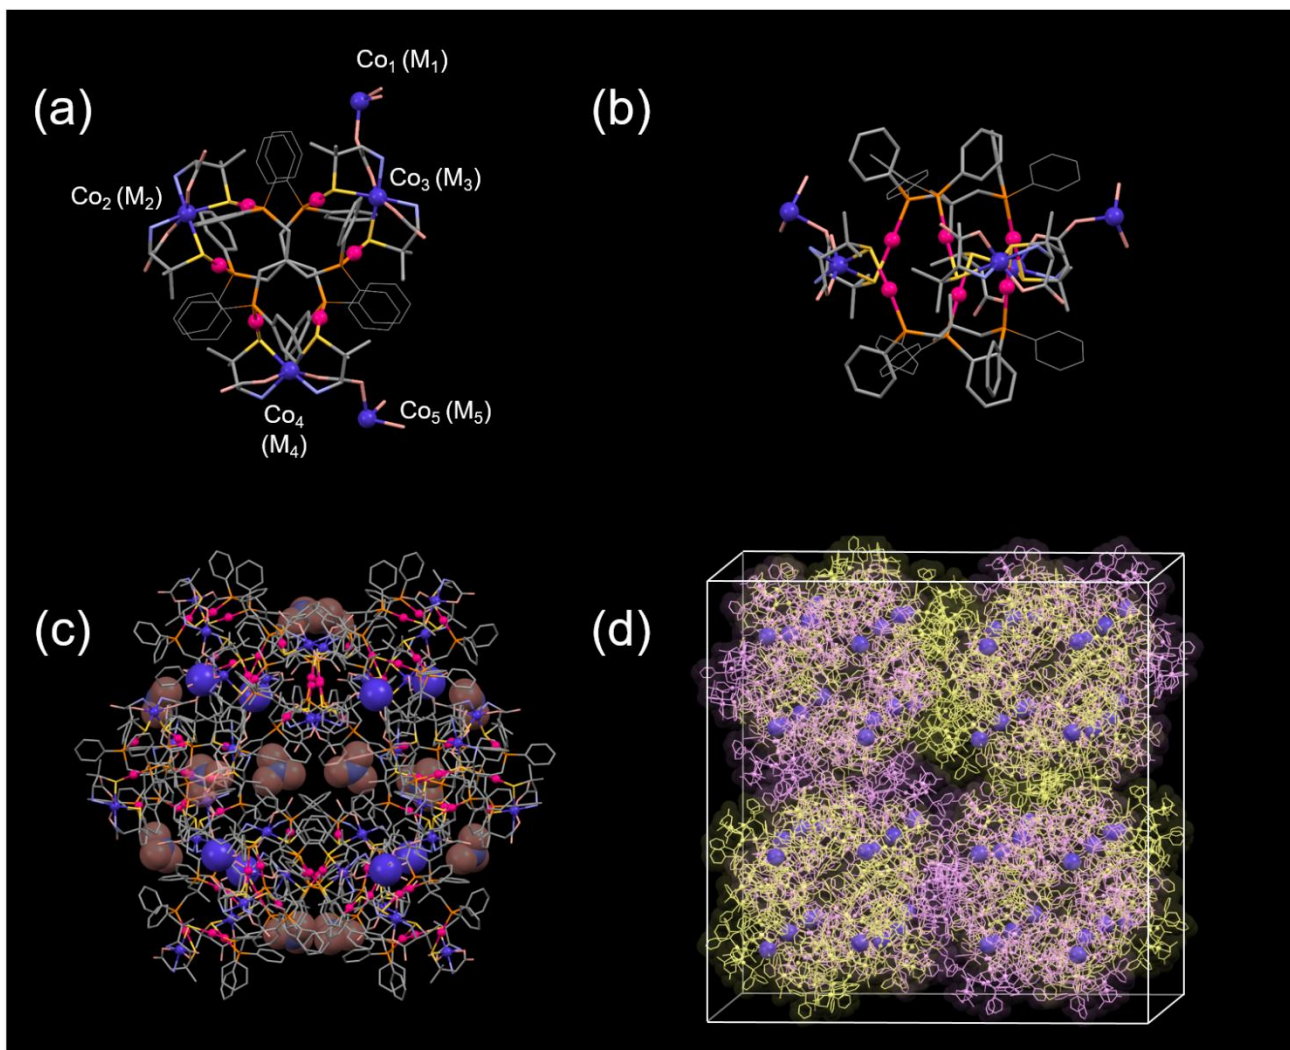

**Fig. S4.** Expanded illustration of Fig. 1. Crystal structures of **1Co**. Top (a) and side (b) views of the  $[\text{Co}^{\text{III}}(\text{L}^{\text{Au}^3})_2]$  molecule with linking  $\text{Co}^{\text{II}}$  atoms. (c) The entire  $\text{Au}^{\text{I}}_{72}\text{Co}^{\text{II}}_{44}$  cage-of-cage with  $\text{NO}_3^-$  anions. (d) The packing of the cage-of-cage molecules (cream and pink). Colour codes: red, Au; violet, Co; orange, P; yellow, S; pink, O; pale blue, N; grey, C.



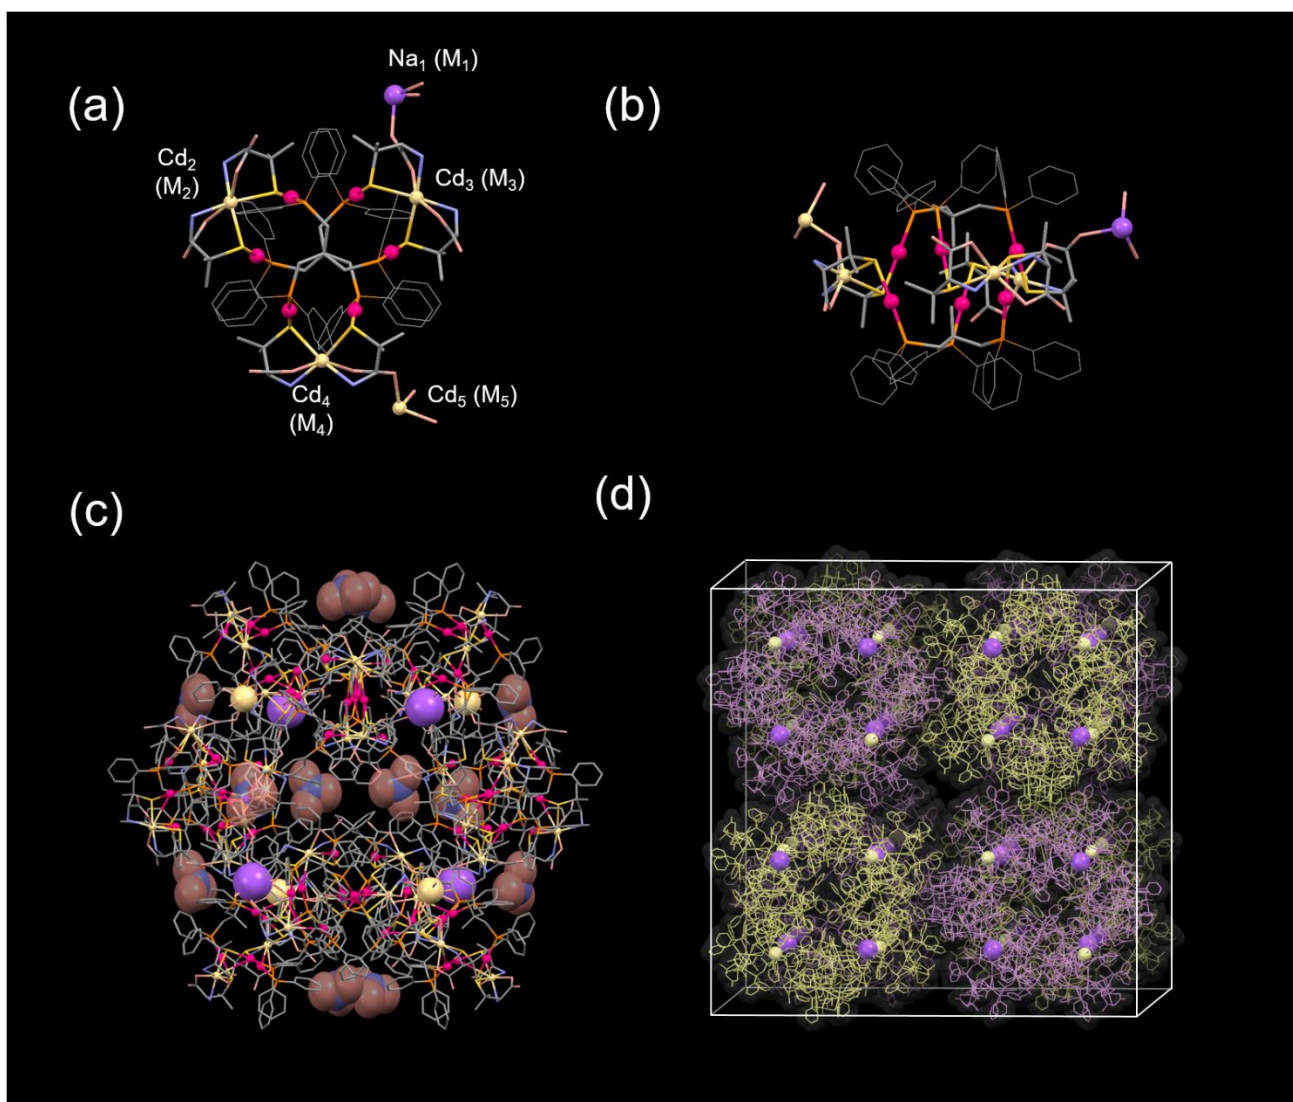

**Fig. S5.** Crystal structures of  $1_{\text{CdNa}}$ . (a) Top and (b) side views of the  $[\text{Cd}^{\text{II}}_3(\text{L}^{\text{Au}^3})_2]$  molecule linking  $\text{Cd}^{\text{II}}$  and  $\text{Na}^{\text{I}}$  atoms. (c) The entire  $\text{Au}^{\text{I}}_{72}\text{Cd}^{\text{II}}_{40}\text{Na}^{\text{I}}_4$  cage-of-cage molecule with  $\text{NO}_3^-$  anions. (d) The packing of the cage-of-cage molecules (cream and pink). Colour codes: red, Au; cream, Cd; purple, Na; orange, P; yellow, S; pink, O; pale blue, N; grey, C.

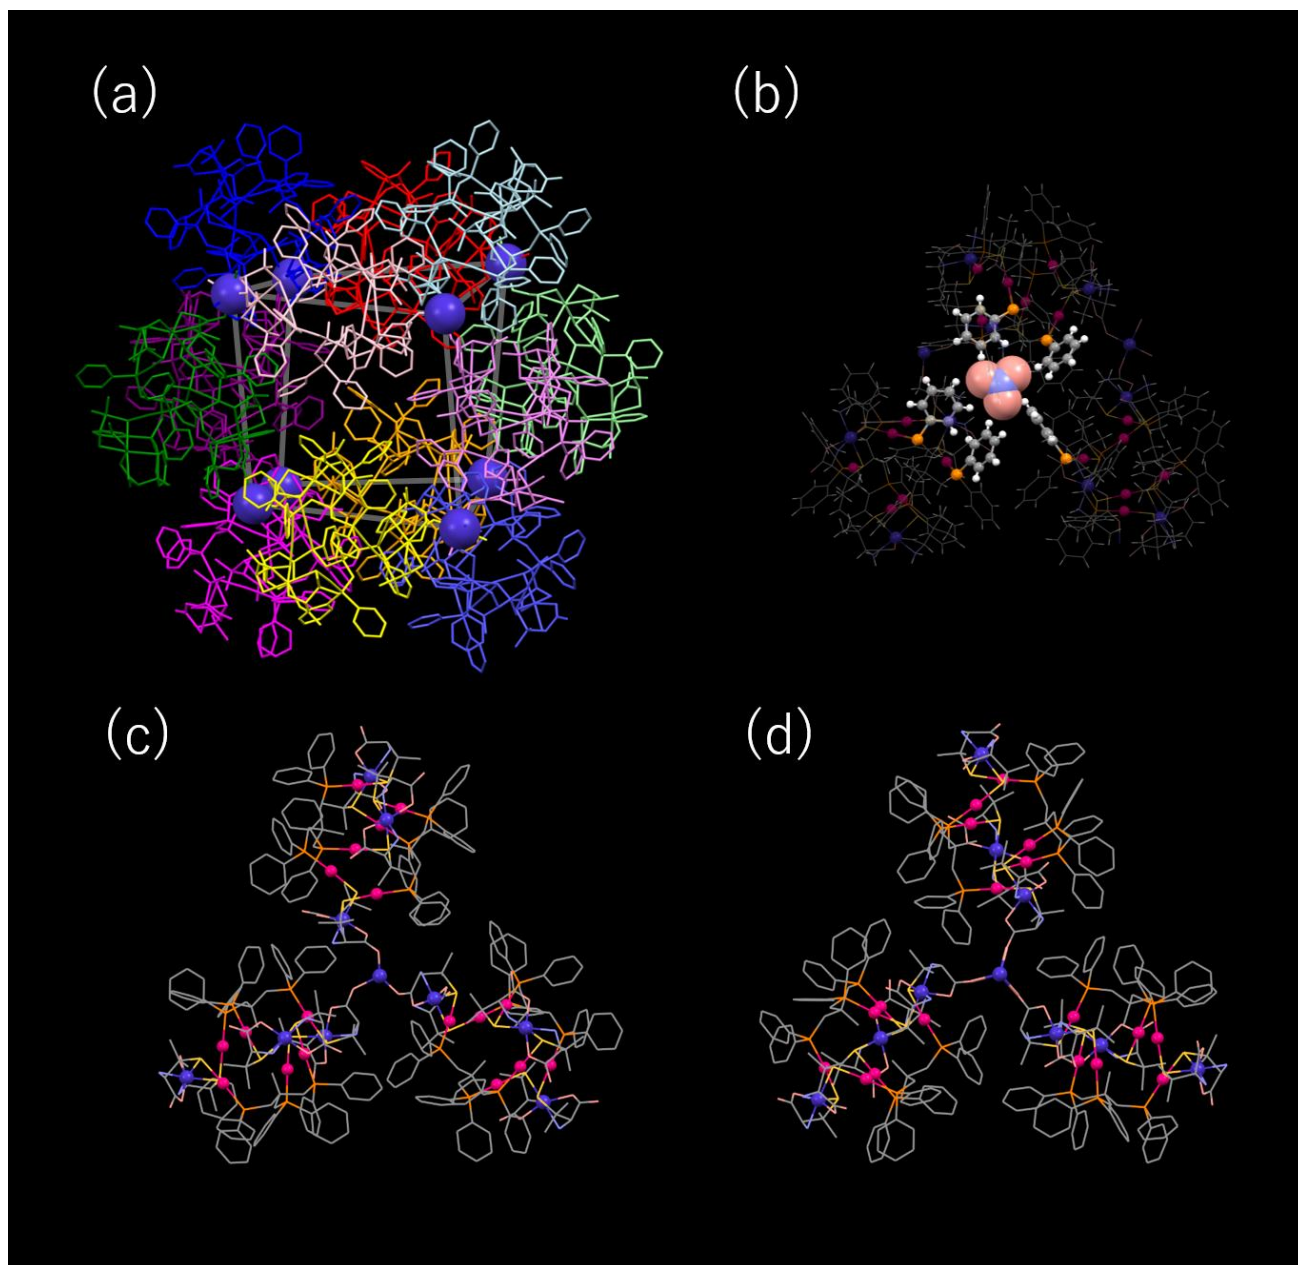

**Fig. S6.** (a) A perspective view of a  $\text{Au}^{\text{I}}_{72}\text{Co}^{\text{II}}_{44}$  cage-of-cage cation in **1Co**. (b) A nitrate anion attached to the surface via  $\text{CH}\cdots\text{O}$  interactions. (c) A  $\text{Co}^{\text{II}}$  centre (M1 site) linking three  $[\text{Co}_3(\text{L}^{\text{Au}^3})_2]$  molecules. (d) A  $\text{Co}^{\text{II}}$  centre (M5 site) linking three  $[\text{Co}_3(\text{L}^{\text{Au}^3})_2]$  molecules. Colour codes: red, Au; violet, Co; orange, P; yellow, S; pink, O; pale blue, N; grey, C.

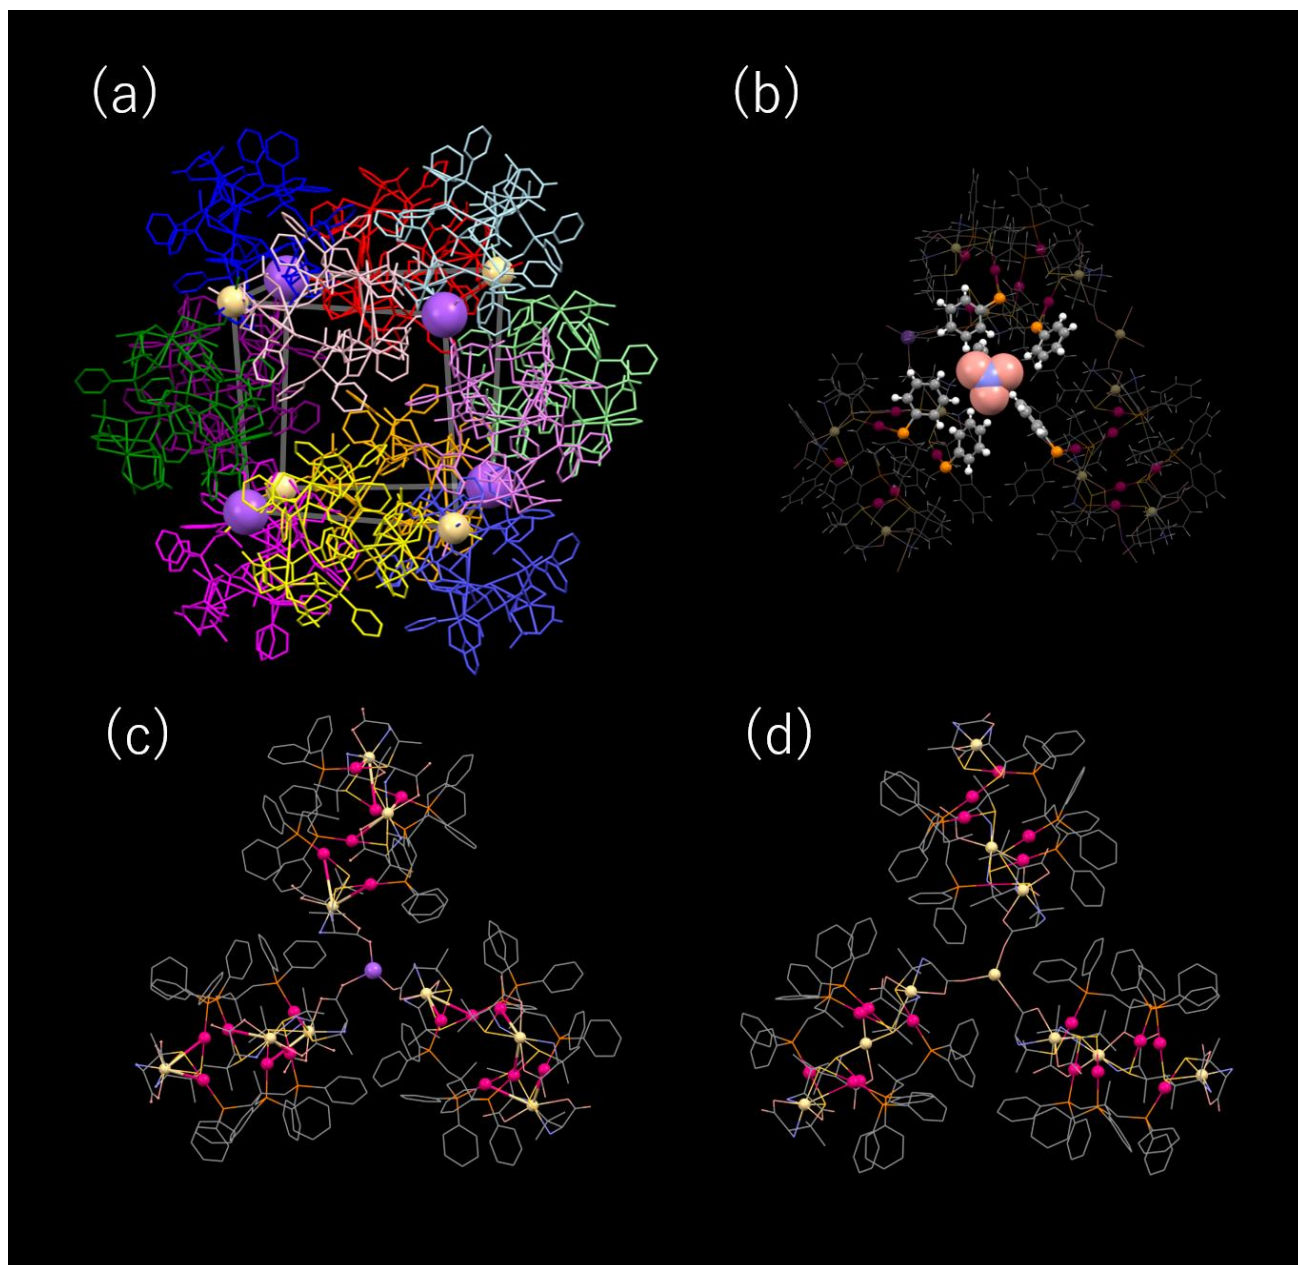

**Fig. S7.** (a) A perspective view of a  $\text{Au}^{\text{I}}_{72}\text{Cd}^{\text{II}}_{40}\text{Na}^{\text{I}}_4$  cage-of-cage cation in  $\mathbf{1}_{\text{CdNa}}$ . (b) A nitrate anion attached to the surface via  $\text{CH}\cdots\text{O}$  interactions. (c) A  $\text{Na}^{\text{I}}$  centre (M1 site) linking three  $[\text{Cd}_3(\text{L}^{\text{Au}^3})_2]$  molecules. (d) A  $\text{Cd}^{\text{II}}$  centre (M5 site) linking three  $[\text{Cd}_3(\text{L}^{\text{Au}^3})_2]$  molecules. Colour codes: red, Au; cream, Cd; purple, Na; orange, P; yellow, S; pink, O; pale blue, N; grey, C.

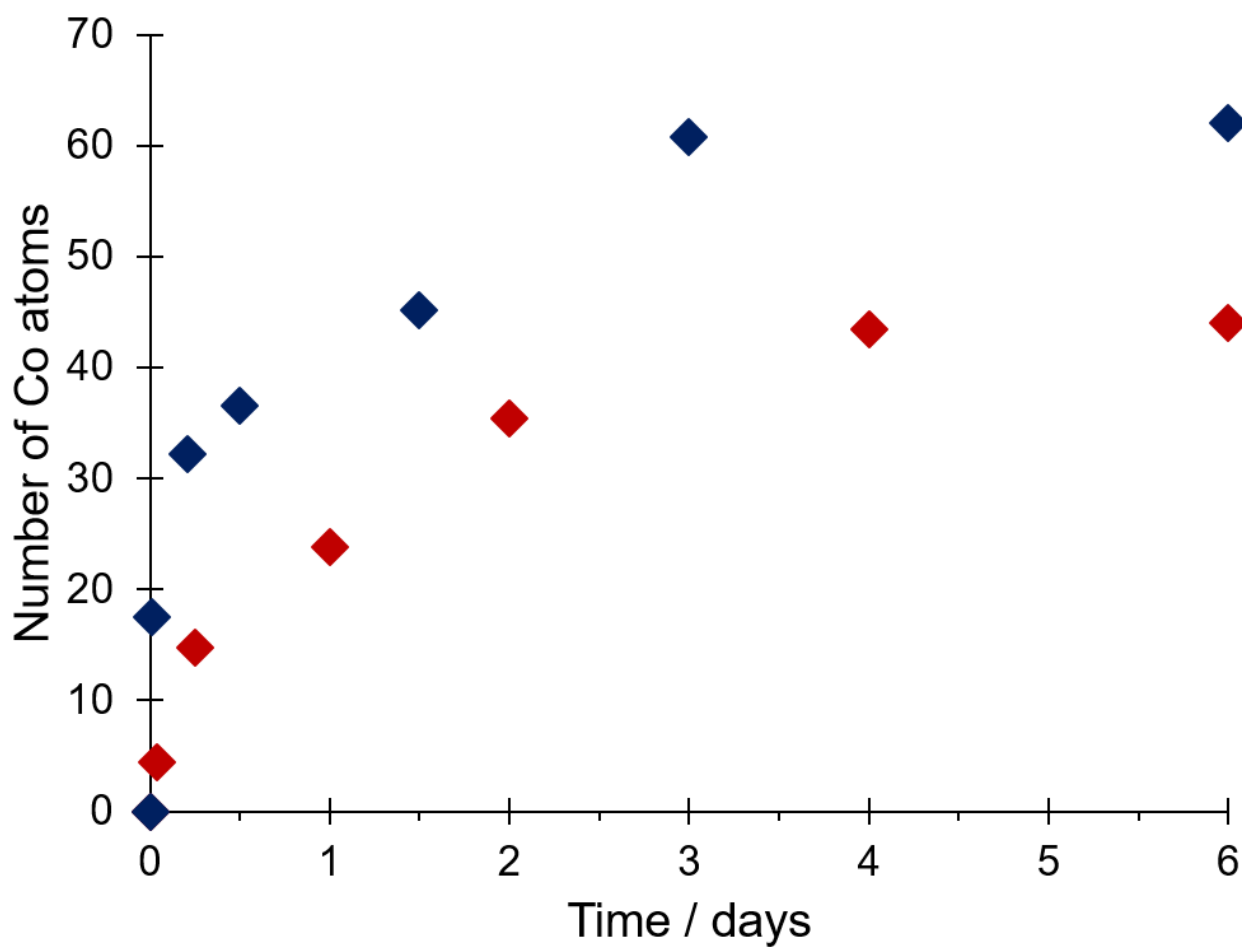

**Fig. S8.** Time-dependent changes in the numbers of  $\text{Co}^{\text{II}}$  atoms per cage-of-cage molecule determined by X-ray fluorescence analysis (blue) and single-crystal X-ray diffraction analysis (red). The difference in the numbers of  $\text{Co}^{\text{II}}$  atoms between these methods corresponds to aqua  $\text{Co}^{\text{II}}$  species existing in the crystal interstices, which could not be located in the X-ray structure.

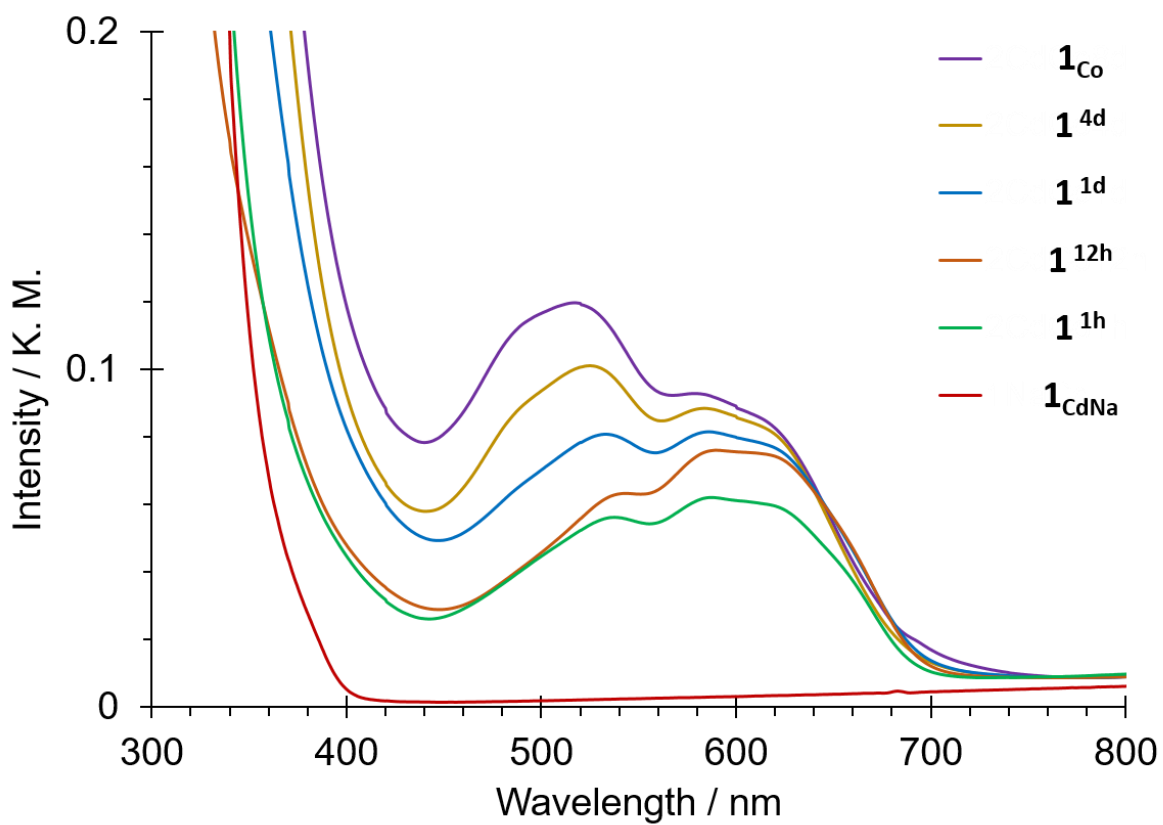

Fig. S9. Diffuse reflection spectra of 1<sub>CdNa</sub>, 1<sub>1h</sub>, 1<sub>12h</sub>, 1<sub>1d</sub>, 1<sub>4d</sub>, and 1<sub>Co</sub>.



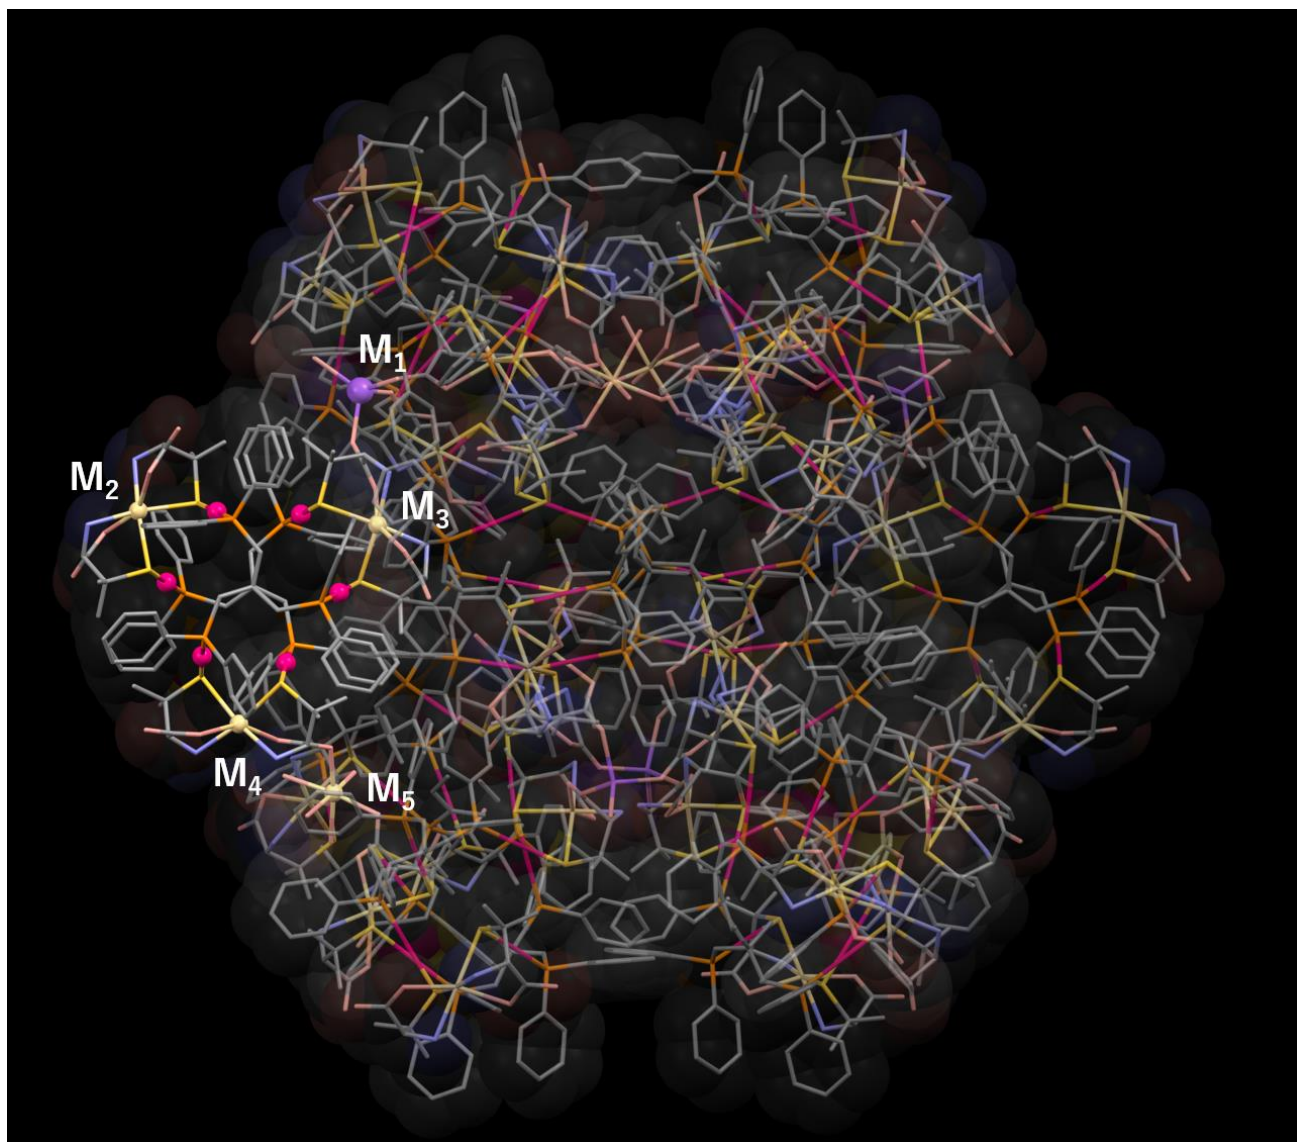

**Fig. S10.** The entire  $\text{Au}^{\text{I}}_{72}\text{Cd}^{\text{II}}_{40}\text{Na}^{\text{I}}_4$  cage-of-cage molecule. Colour codes: red, Au; cream, Cd; purple, Na; orange, P; yellow, S; pink, O; pale blue, N; grey, C.

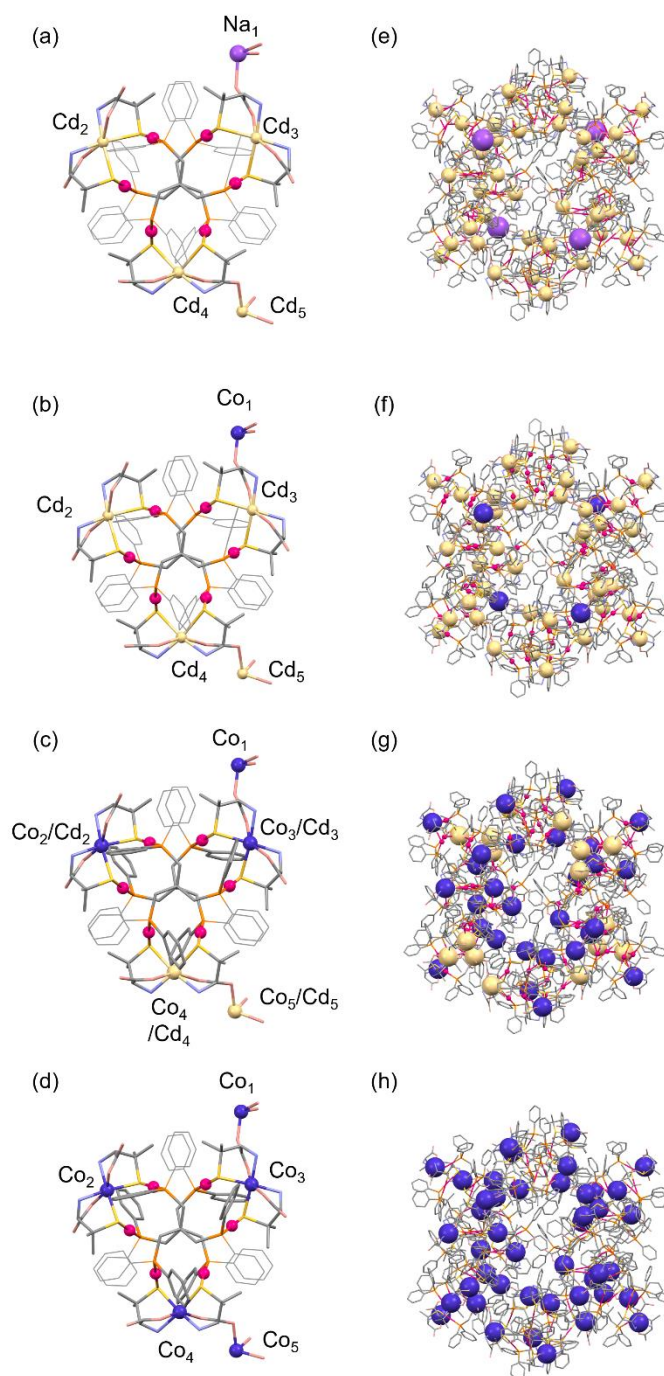

**Fig. S11.** Expanded illustration of Fig. 4. Crystal structures of (a-d) the asymmetric units and (e-h) the cage-of-cage molecules in  $1_{\text{NaCd}}$ ,  $1^{1h}$ ,  $1^{1d}$ , and  $1_{\text{Co}}$ . (a)  $1_{\text{NaCd}}$ . (b)  $1^{1h}$ :  $\text{Cd}^{\text{II}}$  and  $\text{Co}^{\text{II}}$  atoms are disordered at the  $M_2$  metal centre with site occupancies of 0.97 and 0.03, respectively. (c)  $1^{1d}$ :  $\text{Co}^{\text{II}}$  and  $\text{Cd}^{\text{II}}$  atoms are disordered at  $M_2$ ,  $M_3$ ,  $M_4$ , and  $M_5$  metal centres with site occupancies of 0.71/0.29 for  $M_2$ , 0.57/0.43 for  $M_3$ , 0.25/0.75 for  $M_4$ , and 0.33/0.67 for  $M_5$ , respectively. (d)  $1_{\text{Co}}$ . Colour codes: red, Au; cream, Cd; purple, Na; violet, Co; orange, P; yellow, S; pink, O; pale blue, N; grey, C.

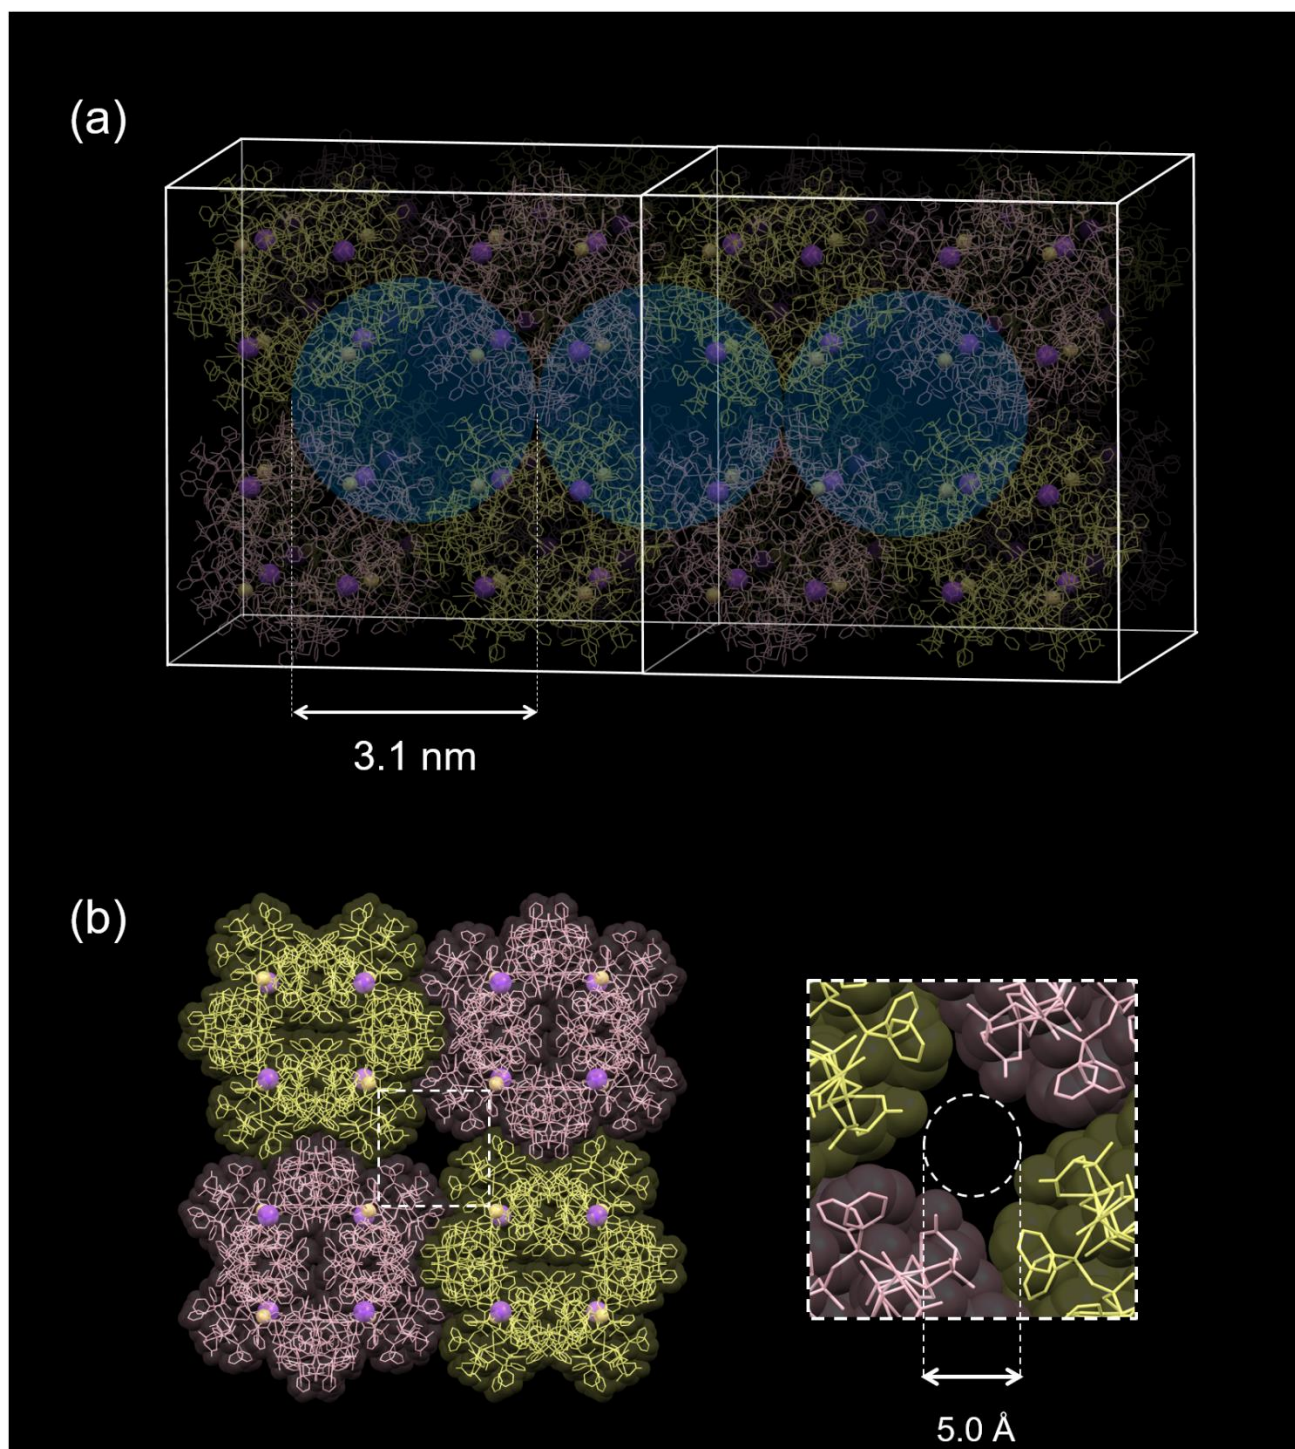

**Fig. S12.** Crystal structures of  $1_{CdNa}$ . Perspective views that show (a) the large interstices (diameters of  $\sim 3.1$  nm) and (b) the pore window with the shortest diameter of 5.0 Å.



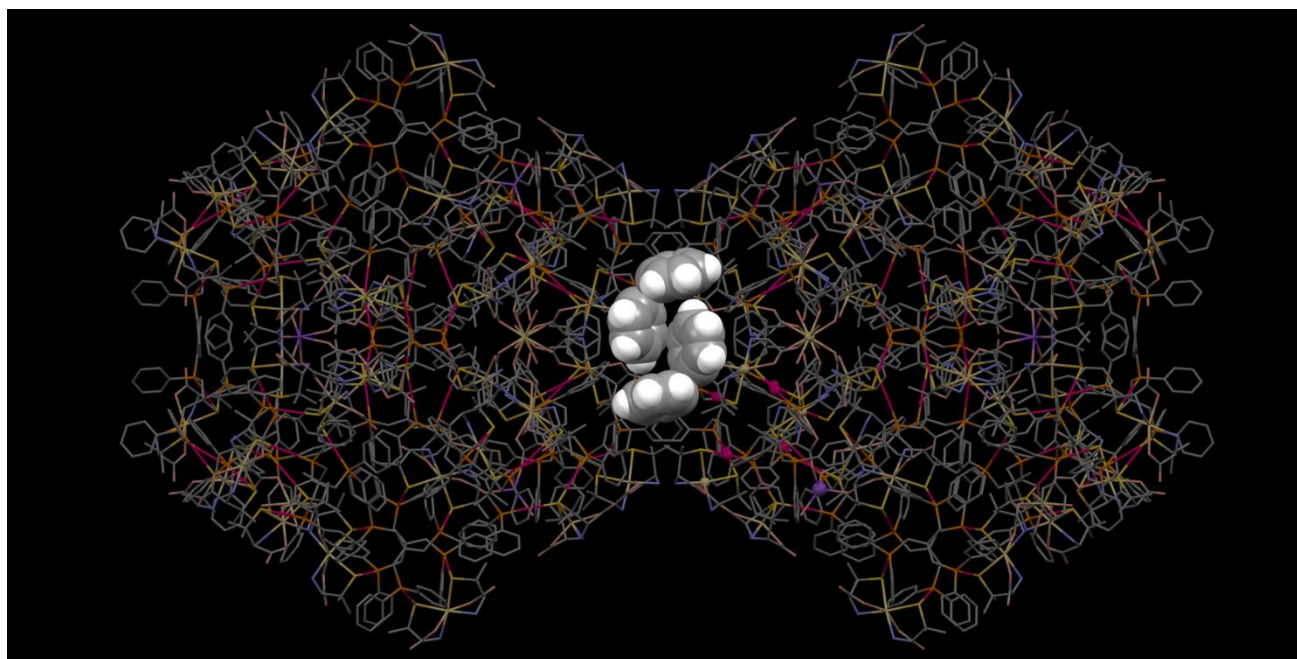

**Fig. S13.** A perspective view that shows the contact between the two cage-of-cage molecules through CH--- $\pi$  and  $\pi$ --- $\pi$  interactions. Colour codes: red, Au; cream, Cd; purple, Na; orange, P; yellow, S; pink, O; pale blue, N; grey, C.

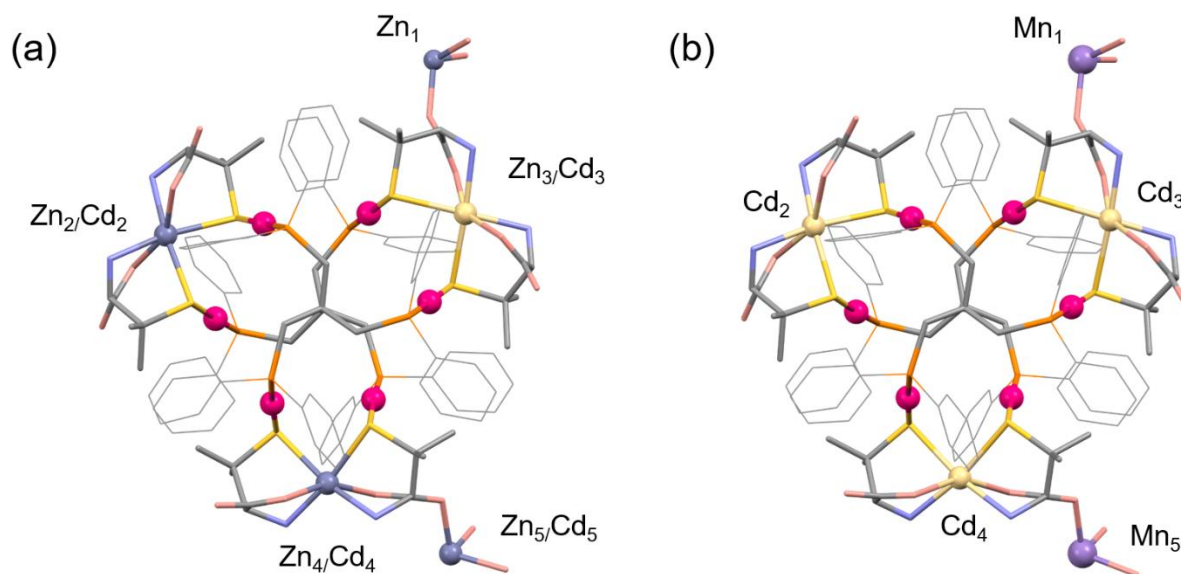

**Fig. S14.** Crystal structures of the asymmetric units of **1<sub>CdZn</sub>** and **1<sub>CdMn</sub>**, which were obtained by soaking crystals of **1<sub>CdNa</sub>** in 1M aqueous  $\text{Zn}(\text{NO}_3)_2$  and  $\text{Mn}(\text{NO}_3)_2$ , respectively, for 2 weeks. (a) **1<sub>CdZn</sub>**:  $\text{Zn}^{\text{II}}$  and  $\text{Cd}^{\text{II}}$  atoms were disordered at  $M_2$ ,  $M_3$ ,  $M_4$  and  $M_5$  metal centres with site occupancies of  $\text{Zn}/\text{Cd} = 0.68/0.32$ ,  $0.33/0.67$ ,  $0.59/0.41$  and  $0.83/0.17$  for  $M_2$ ,  $M_3$ ,  $M_4$  and  $M_5$ , respectively, while  $M_1$  site was refined as a Zn atom. Crystallographic data, Cubic  $F432$ ,  $a = b = c = 77.1192(5)$  Å,  $V = 458,656(9)$  Å<sup>3</sup>,  $R_1 (I > 2\sigma(I)) = 0.0640$ ,  $R_{w2} (\text{all data}) = 0.2074$  (CCDC 2080059). (b) **1<sub>CdMn</sub>**:  $M_1$  and  $M_5$  metal centres were refined as a Mn atom, while  $M_2$ ,  $M_3$  and  $M_4$  centres were refined as a Cd atom, indicative of the replacement of  $\text{Cd}^{\text{II}}$  in **1<sub>CdNa</sub>** by  $\text{Mn}^{\text{II}}$  at only linking metal sites of  $M_1$  and  $M_5$ . Crystallographic data, Cubic  $F432$ ,  $a = b = c = 77.5594(4)$  Å,  $V = 466,556(7)$  Å<sup>3</sup>,  $R_1 (I > 2\sigma(I)) = 0.0572$ ,  $R_{w2} (\text{all data}) = 0.1827$  (CCDC 2080060). Colour codes: red, Au; cream, Cd; pale purple, Zn; light purple, Mn; orange, P; yellow, S; pink, O; pale blue, N; grey, C.

**Table S1.** Crystallographic data for **1<sub>CdNa</sub>**, **1<sup>1h</sup>**, **1<sup>6h</sup>**, **1<sup>1d</sup>**, **1<sup>2d</sup>**, **1<sup>4d</sup>**, and **1<sub>Co</sub>**.

|                                             | <b>1<sub>CdNa</sub></b>                                                                                                                                   | <b>1<sup>1h</sup></b>                                                                                                                                             | <b>1<sup>6h</sup></b>                                                                                                                                             | <b>1<sup>1d</sup></b>                                                                                                                                             |
|---------------------------------------------|-----------------------------------------------------------------------------------------------------------------------------------------------------------|-------------------------------------------------------------------------------------------------------------------------------------------------------------------|-------------------------------------------------------------------------------------------------------------------------------------------------------------------|-------------------------------------------------------------------------------------------------------------------------------------------------------------------|
| CCDC No.                                    | 2054688                                                                                                                                                   | 2054689                                                                                                                                                           | 2056446                                                                                                                                                           | 2054592                                                                                                                                                           |
| Formula                                     | C <sub>1344</sub> H <sub>2140</sub> Au <sub>72</sub> Cd <sub>40</sub><br>N <sub>84</sub> Na <sub>4</sub> O <sub>458</sub> P <sub>72</sub> S <sub>72</sub> | C <sub>1344</sub> H <sub>2002</sub> Au <sub>72</sub> Cd <sub>39.64</sub><br>Co <sub>22.46</sub> N <sub>124</sub> O <sub>509</sub> P <sub>72</sub> S <sub>72</sub> | C <sub>1344</sub> H <sub>2008</sub> Au <sub>72</sub> Cd <sub>29.20</sub><br>Co <sub>32.80</sub> N <sub>124</sub> O <sub>512</sub> P <sub>72</sub> S <sub>72</sub> | C <sub>1344</sub> H <sub>2024</sub> Au <sub>72</sub> Cd <sub>20.18</sub><br>Co <sub>41.82</sub> N <sub>124</sub> O <sub>520</sub> P <sub>72</sub> S <sub>72</sub> |
| Colour, form                                | Colourless, cubic                                                                                                                                         | Pale purple, block                                                                                                                                                | Pale purple, block                                                                                                                                                | Purple, cubic                                                                                                                                                     |
| Crystal size/ mm <sup>3</sup>               | 0.11×0.11×0.11                                                                                                                                            | 0.14×0.14×0.11                                                                                                                                                    | 0.14×0.14×0.14                                                                                                                                                    | 0.19×0.19×0.19                                                                                                                                                    |
| Wavelength/ Å                               | 0.6500                                                                                                                                                    |                                                                                                                                                                   |                                                                                                                                                                   |                                                                                                                                                                   |
| Crystal system                              | Cubic                                                                                                                                                     | Cubic                                                                                                                                                             | Cubic                                                                                                                                                             | Cubic                                                                                                                                                             |
| Space group                                 | <i>F</i> 432                                                                                                                                              | <i>F</i> 432                                                                                                                                                      | <i>F</i> 432                                                                                                                                                      | <i>F</i> 432                                                                                                                                                      |
| <i>a</i> = <i>b</i> = <i>c</i> / Å          | 77.714(9)                                                                                                                                                 | 77.522(9)                                                                                                                                                         | 77.518(9)                                                                                                                                                         | 77.485(9)                                                                                                                                                         |
| $\alpha = \beta = \gamma / ^\circ$          | 90                                                                                                                                                        | 90                                                                                                                                                                | 90                                                                                                                                                                | 90                                                                                                                                                                |
| <i>V</i> / Å <sup>3</sup>                   | 469,342(159)                                                                                                                                              | 465,879(159)                                                                                                                                                      | 465,809(159)                                                                                                                                                      | 465,209(160)                                                                                                                                                      |
| <i>Z</i>                                    | 8                                                                                                                                                         | 8                                                                                                                                                                 | 8                                                                                                                                                                 | 8                                                                                                                                                                 |
| <i>T</i> / K                                | 100(2)                                                                                                                                                    | 100(2)                                                                                                                                                            | 100(2)                                                                                                                                                            | 100(2)                                                                                                                                                            |
| Flack parameter                             | 0.013(1)                                                                                                                                                  | 0.006(1)                                                                                                                                                          | 0.001(1)                                                                                                                                                          | 0.001(1)                                                                                                                                                          |
| R <sub>1</sub> ( <i>I</i> > 2σ( <i>I</i> )) | 0.0403                                                                                                                                                    | 0.0451                                                                                                                                                            | 0.0470                                                                                                                                                            | 0.0508                                                                                                                                                            |
| Rw <sub>2</sub> (all data)                  | 0.1139                                                                                                                                                    | 0.1477                                                                                                                                                            | 0.1580                                                                                                                                                            | 0.1875                                                                                                                                                            |
| GOF                                         | 1.054                                                                                                                                                     | 1.038                                                                                                                                                             | 1.064                                                                                                                                                             | 1.023                                                                                                                                                             |

**Table S1. (Continued)**

|                                             | <b>1<sup>2d</sup></b>                                                                                                                                            | <b>1<sup>4d</sup></b>                                                                                                                                            | <b>1<sup>Co</sup></b>                                                                                                                      |
|---------------------------------------------|------------------------------------------------------------------------------------------------------------------------------------------------------------------|------------------------------------------------------------------------------------------------------------------------------------------------------------------|--------------------------------------------------------------------------------------------------------------------------------------------|
| CCDC No.                                    | 2054593                                                                                                                                                          | 2054594                                                                                                                                                          | 2054595                                                                                                                                    |
| Formula                                     | C <sub>1344</sub> H <sub>1978</sub> Au <sub>72</sub> Cd <sub>8.61</sub><br>Co <sub>53.39</sub> N <sub>124</sub> O <sub>497</sub> P <sub>72</sub> S <sub>72</sub> | C <sub>1344</sub> H <sub>2144</sub> Au <sub>72</sub> Cd <sub>0.60</sub><br>Co <sub>61.40</sub> N <sub>124</sub> O <sub>580</sub> P <sub>72</sub> S <sub>72</sub> | C <sub>1344</sub> H <sub>2104</sub> Au <sub>72</sub> Co <sub>62</sub> N <sub>124</sub><br>O <sub>560</sub> P <sub>72</sub> S <sub>72</sub> |
| Colour, form                                | Purple, cubic                                                                                                                                                    | Purple, cubic                                                                                                                                                    | Purple, cubic                                                                                                                              |
| Crystal size/ mm <sup>3</sup>               | 0.12×0.12×0.12                                                                                                                                                   | 0.10×0.10×0.10                                                                                                                                                   | 0.09×0.08×0.06                                                                                                                             |
| Wavelength/ Å                               | 0.6500                                                                                                                                                           |                                                                                                                                                                  |                                                                                                                                            |
| Crystal system                              | Cubic                                                                                                                                                            | Cubic                                                                                                                                                            | Cubic                                                                                                                                      |
| Space group                                 | <i>F</i> 432                                                                                                                                                     | <i>F</i> 432                                                                                                                                                     | <i>F</i> 432                                                                                                                               |
| <i>a</i> = <i>b</i> = <i>c</i> / Å          | 77.370(9)                                                                                                                                                        | 76.326(9)                                                                                                                                                        | 76.541(9)                                                                                                                                  |
| $\alpha = \beta = \gamma / ^\circ$          | 90                                                                                                                                                               | 90                                                                                                                                                               | 90                                                                                                                                         |
| <i>V</i> / Å <sup>3</sup>                   | 463,149(160)                                                                                                                                                     | 444,649(154)                                                                                                                                                     | 448,417(155)                                                                                                                               |
| <i>Z</i>                                    | 8                                                                                                                                                                | 8                                                                                                                                                                | 8                                                                                                                                          |
| <i>T</i> / K                                | 100(2)                                                                                                                                                           | 100(2)                                                                                                                                                           | 100(2)                                                                                                                                     |
| Flack parameter                             | 0.001(1)                                                                                                                                                         | 0.012(2)                                                                                                                                                         | 0.003(3)                                                                                                                                   |
| R <sub>1</sub> ( <i>I</i> > 2σ( <i>I</i> )) | 0.0505                                                                                                                                                           | 0.0510                                                                                                                                                           | 0.0540                                                                                                                                     |
| R <sub>w</sub> 2 (all data)                 | 0.1827                                                                                                                                                           | 0.1824                                                                                                                                                           | 0.1945                                                                                                                                     |
| GOF                                         | 1.032                                                                                                                                                            | 0.920                                                                                                                                                            | 0.983                                                                                                                                      |

**Table S2.** Selected bond length (Å) for **1CdNa**, **1<sup>1h</sup>**, **1<sup>6h</sup>**, **1<sup>1d</sup>**, **1<sup>2d</sup>**, **1<sup>4d</sup>**, and **1Co**.

|                                                 | Bond length / Å                  |                                   |                                   |                                   |
|-------------------------------------------------|----------------------------------|-----------------------------------|-----------------------------------|-----------------------------------|
|                                                 | <b>1CdNa</b>                     | <b>1<sup>1h</sup></b>             | <b>1<sup>6h</sup></b>             | <b>1<sup>1d</sup></b>             |
| M <sub>1</sub> -O <sub>10</sub>                 | 2.234(6)                         | 2.042(10)                         | 2.067(14)                         | 2.054(17)                         |
| M <sub>2</sub> -S <sub>1</sub> /S <sub>4</sub>  | ave. 2.646<br>2.636(2)/2.656(2)  | ave. 2.649<br>2.647(3)/2.651(4)   | ave. 2.598<br>2.596(4)/2.600(4)   | ave. 2.538<br>2.537(4)/2.539(5)   |
| M <sub>2</sub> -O <sub>1</sub> /O <sub>7</sub>  | ave. 2.353<br>2.364(8)/2.342(8)  | ave. 2.338<br>2.345(11)/2.331(9)  | ave. 2.249<br>2.255(13)/2.243(10) | ave. 2.176<br>2.191(15)/2.162(12) |
| M <sub>2</sub> -N <sub>1</sub> /N <sub>4</sub>  | ave. 2.335<br>2.324(9)/2.346(9)  | ave. 2.310<br>2.314(13)/2.306(11) | ave. 2.286<br>2.302(14)/2.271(14) | ave. 2.211<br>2.197(17)/2.226(15) |
| M <sub>3</sub> -S <sub>2</sub> /S <sub>5</sub>  | ave. 2.637<br>2.630(2)/2.644(2)  | ave. 2.627<br>2.623(3)/2.631(3)   | ave. 2.614<br>2.592(7)/2.636(8)   | ave. 2.536<br>2.530(5)/2.542(4)   |
| M <sub>3</sub> -O <sub>3</sub> /O <sub>9</sub>  | ave. 2.366<br>2.380(6)/2.351(5)  | ave. 2.363<br>2.319(10)/2.408(8)  | ave. 2.286<br>2.252(15)/2.320(11) | ave. 2.207<br>2.136(17)/2.279(11) |
| M <sub>3</sub> -N <sub>2</sub> /N <sub>5</sub>  | ave. 2.338<br>2.355(8)/2.321(6)  | ave. 2.325<br>2.311(10)/2.340(10) | ave. 2.277<br>2.272(15)/2.282(14) | ave. 2.228<br>2.217(14)/2.240(15) |
| M <sub>4</sub> -S <sub>3</sub> /S <sub>6</sub>  | ave. 2.645<br>2.658(2)/2.633(17) | ave. 2.648<br>2.658(3)/2.638(3)   | ave. 2.636<br>2.644(4)/2.629(3)   | ave. 2.614<br>2.610(5)/2.618(4)   |
| M <sub>4</sub> -O <sub>5</sub> /O <sub>11</sub> | ave. 2.384<br>2.395(7)/2.372(5)  | ave. 2.368<br>2.386(10)/2.360(6)  | ave. 2.357<br>2.358(12)/2.357(7)  | ave. 2.321<br>2.316(15)/2.337(8)  |
| M <sub>4</sub> -N <sub>3</sub> /N <sub>6</sub>  | ave. 2.328<br>2.302(8)/2.354(6)  | ave. 2.323<br>2.306(12)/2.340(10) | ave. 2.335<br>2.325(15)/2.346(11) | ave. 2.302<br>2.266(19)/2.339(14) |
| M <sub>5</sub> -O <sub>12</sub>                 | 2.243(5)                         | 2.221(6)                          | 2.206(7)                          | 2.209(9)                          |

**Table S2.** (Continued)

|                                                 | Bond length / Å                   |                                   |                                   |
|-------------------------------------------------|-----------------------------------|-----------------------------------|-----------------------------------|
|                                                 | <b>1<sup>2d</sup></b>             | <b>1<sup>4d</sup></b>             | <b>1<sub>Co</sub></b>             |
| M <sub>1</sub> -O <sub>10</sub>                 | 2.058(14)                         | 2.102(13)                         | 2.079(16)                         |
| M <sub>2</sub> -S <sub>1</sub> /S <sub>4</sub>  | ave. 2.503<br>2.508(4)/2.496(5)   | ave. 2.458<br>2.451(6)/2.465(5)   | ave. 2.472<br>2.460(7)/2.485(7)   |
| M <sub>2</sub> -O <sub>1</sub> /O <sub>7</sub>  | ave. 2.125<br>2.146(12)/2.113(11) | ave. 2.094<br>2.087(15)/2.108(13) | ave. 2.119<br>2.117(19)/2.122(16) |
| M <sub>2</sub> -N <sub>1</sub> /N <sub>4</sub>  | ave. 2.191<br>2.201(14)/2.186(13) | ave. 2.189<br>2.147(15)/2.231(13) | ave. 2.119<br>2.125(19)/2.213(16) |
| M <sub>3</sub> -S <sub>2</sub> /S <sub>5</sub>  | ave. 2.498<br>2.499(4)/2.496(4)   | ave. 2.414<br>2.407(6)/2.423(5)   | ave. 2.417<br>2.413(8)/2.421(7)   |
| M <sub>3</sub> -O <sub>3</sub> /O <sub>9</sub>  | ave. 2.110<br>2.021(14)/2.203(10) | ave. 2.049<br>2.039(15)/2.062(12) | ave. 2.044<br>2.011(19)/2.077(15) |
| M <sub>3</sub> -N <sub>2</sub> /N <sub>5</sub>  | ave. 2.150<br>2.152(13)/2.159(13) | ave. 2.135<br>2.130(16)/2.127(16) | ave. 2.114<br>2.14(2)/2.089(19)   |
| M <sub>4</sub> -S <sub>3</sub> /S <sub>6</sub>  | ave. 2.544<br>2.528(5)/2.560(4)   | ave. 2.447<br>2.445(5)/2.450(5)   | ave. 2.446<br>2.449(7)/2.444(6)   |
| M <sub>4</sub> -O <sub>5</sub> /O <sub>11</sub> | ave. 2.243<br>2.220(15)/2.274(9)  | ave. 2.124<br>2.097(12)/2.141(10) | ave. 2.130<br>2.115(15)/2.146(12) |
| M <sub>4</sub> -N <sub>3</sub> /N <sub>6</sub>  | ave. 2.222<br>2.197(18)/2.255(14) | ave. 2.142<br>2.132(17)/2.144(15) | ave. 2.168<br>2.16(2)/2.176(19)   |
| M <sub>5</sub> -O <sub>12</sub>                 | 2.165(9)                          | 2.125(11)                         | 2.132(15)                         |

**Table S3.** Site occupancies of metal centres (M<sub>1</sub>, M<sub>2</sub>, M<sub>3</sub>, M<sub>4</sub>, M<sub>5</sub>) for **1<sub>CdNa</sub>**, **1<sup>1h</sup>**, **1<sup>6h</sup>**, **1<sup>1d</sup>**, **1<sup>2d</sup>**, **1<sup>4d</sup>**, and **1<sub>Co</sub>**.

|                                                    | Site occupancy          |                       |                       |                       |
|----------------------------------------------------|-------------------------|-----------------------|-----------------------|-----------------------|
|                                                    | <b>1<sub>CdNa</sub></b> | <b>1<sup>1h</sup></b> | <b>1<sup>6h</sup></b> | <b>1<sup>1d</sup></b> |
| Co <sub>1</sub> /Na <sub>1</sub> (M <sub>1</sub> ) | 0.0/1.0                 | 1.0/0.0               | 1.0/0.0               | 1.0/0.0               |
| Co <sub>2</sub> /Cd <sub>2</sub> (M <sub>2</sub> ) | 0.0/1.0                 | 0.03(1)/0.97(1)       | 0.38(1)/0.62(1)       | 0.71(1)/0.29(1)       |
| Co <sub>3</sub> /Cd <sub>3</sub> (M <sub>3</sub> ) | 0.0/1.0                 | 0.0/1.0               | 0.29(1)/0.71(1)       | 0.57(1)/0.43(1)       |
| Co <sub>4</sub> /Cd <sub>4</sub> (M <sub>4</sub> ) | 0.0/1.0                 | 0.0/1.0               | 0.14(1)/0.86(1)       | 0.26(1)/0.74(1)       |
| Co <sub>5</sub> /Cd <sub>5</sub> (M <sub>5</sub> ) | 0.0/1.0                 | 0.0/1.0               | 0.27(2)/0.73(2)       | 0.33(2)/0.67(2)       |
| Total Co atoms<br>per cage-of-cage <sup>a</sup>    | 0.0                     | 4.4                   | 14.8                  | 23.8                  |

|                                                    | Site occupancy        |                       |                       |
|----------------------------------------------------|-----------------------|-----------------------|-----------------------|
|                                                    | <b>1<sup>2d</sup></b> | <b>1<sup>4d</sup></b> | <b>1<sub>Co</sub></b> |
| Co <sub>1</sub> /Na <sub>1</sub> (M <sub>1</sub> ) | 1.0/0.0               | 1.0/0.0               | 1.0/0.0               |
| Co <sub>2</sub> /Cd <sub>2</sub> (M <sub>2</sub> ) | 0.98(1)/0.02(1)       | 1.0/0.0               | 1.0/0.0               |
| Co <sub>3</sub> /Cd <sub>3</sub> (M <sub>3</sub> ) | 0.85(1)/0.15(1)       | 1.0/0.0               | 1.0/0.0               |
| Co <sub>4</sub> /Cd <sub>4</sub> (M <sub>4</sub> ) | 0.58(1)/0.42(1)       | 0.96(1)/0.04(1)       | 1.0/0.0               |
| Co <sub>5</sub> /Cd <sub>5</sub> (M <sub>5</sub> ) | 0.62(1)/0.38(1)       | 1.0/0.0               | 1.0/0.0               |
| Total Co atoms<br>per cage-of-cage <sup>a</sup>    | 35.4                  | 43.5                  | 44.0                  |

a: Calculated from  $4 \times \text{Co}_1 + 12 \times \text{Co}_2 + 12 \times \text{Co}_3 + 12 \times \text{Co}_4 + 4 \times \text{Co}_5$
